# Supplementary material
Source: Springer Nature journal article supplement (https://www.springermedizin.de/resource/supplementary/12865_2010_342_MOESM12_ESM.pdf/9427792)

# Immunoglobulin G

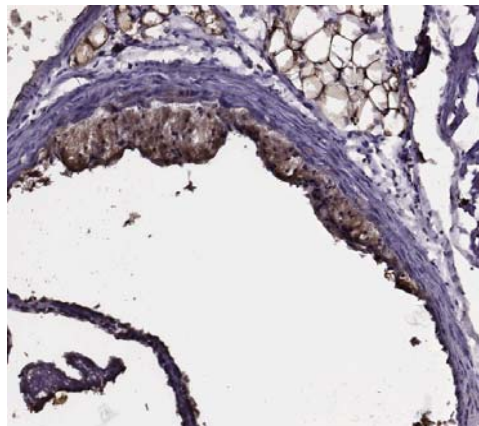

Chow 4 weeks

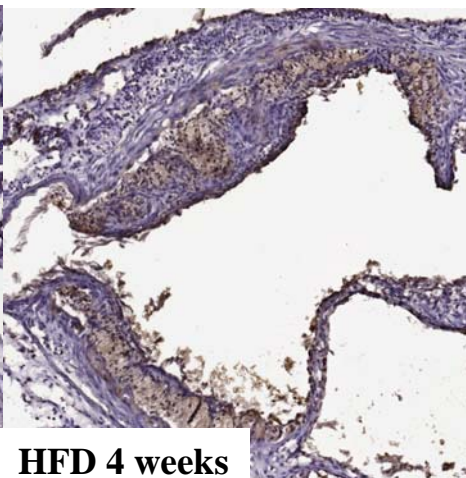

HFD 4 weeks

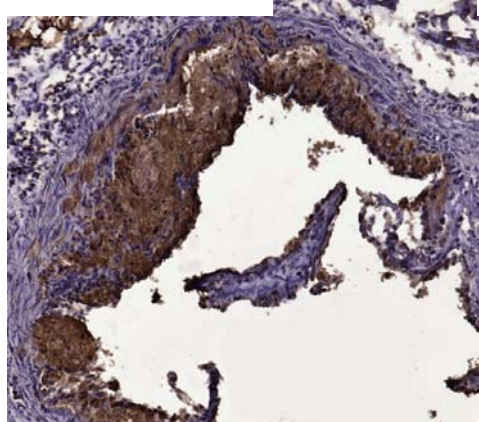

Chow 8 weeks

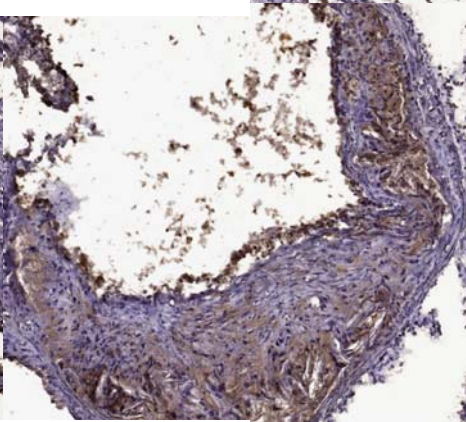

HFD 8 weeks

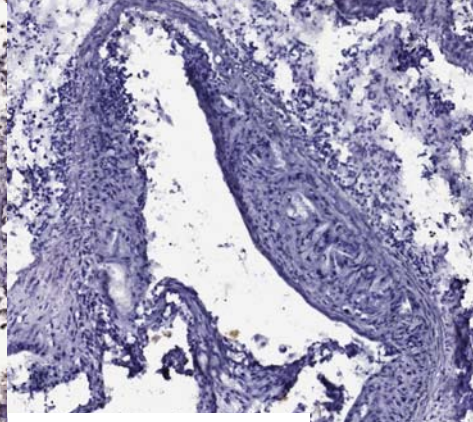

Negative control

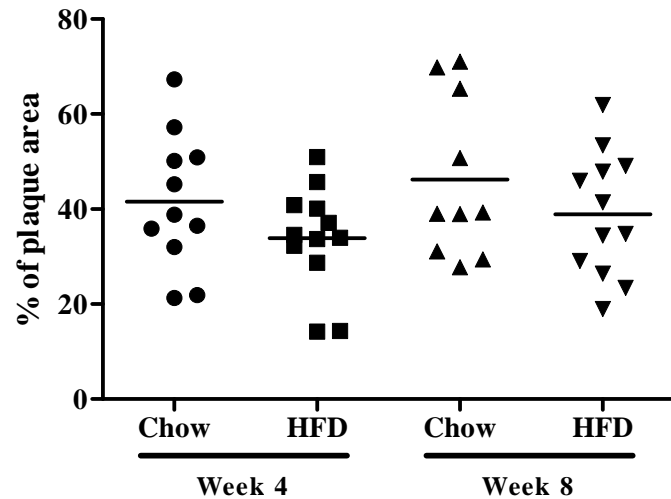

Supplement: MOESM12 [file 9427792]
